# Supplementary material
Source: PubMed Central journal article supplement (PMC3965262)
Supplement: supp_JCO.2013.52.0536_Data_Supplement_JCO.2013.52.0536.pdf [file supp_JCO.2013.52.0536_Data_Supplement_JCO.2013.52.0536.pdf]

**Phase III Randomized, Placebo-Controlled, Double-Blind Study of Intravenous Calcium/Magnesium (CaMg) to Prevent Oxaliplatin-Induced Sensory Neurotoxicity, N08CB (Alliance)**

**Loprinzi, et al**

**Data Supplement**

**Neurotoxicity Evaluation**

| <b>Grade</b>                                                                                                | <b>I</b>                                                                                                                                    | <b>II</b>                                                                                                                           | <b>III</b>                                                                                                                                                                                 | <b>IV</b>                                                                                      |
|-------------------------------------------------------------------------------------------------------------|---------------------------------------------------------------------------------------------------------------------------------------------|-------------------------------------------------------------------------------------------------------------------------------------|--------------------------------------------------------------------------------------------------------------------------------------------------------------------------------------------|------------------------------------------------------------------------------------------------|
| NCI-CTC AE v3.0                                                                                             | loss of deep tendon reflexes or paresthesia, including tingling, but not interfering with function                                          | objective sensory alteration or paresthesia, including tingling, interfering with function, but not with activities of daily living | sensory alteration or paresthesia interfering with activities of daily living                                                                                                              | permanent sensory losses that are disabling                                                    |
| <b>Questions</b>                                                                                            | <b>Sample answers for each toxicity grade</b>                                                                                               |                                                                                                                                     |                                                                                                                                                                                            |                                                                                                |
| Do you have problems tying your shoe laces, buttoning your shirts, fastening buckles or pulling up zippers? | “No, I might feel some tingling in my hands, but I have no problems tying laces, buttoning shirts, fastening buckles or pulling up zippers” | “It is a bit harder than before, but I can still tie laces, button shirts, fasten buckles or pull up zippers”                       | “I have severe difficulties tying shoe laces, buttoning shirts, fastening buckles or pulling up zippers” or “I cannot tie laces, button shirts, fasten buckles or pull up zippers anymore” | “I haven’t been able to tie laces, button shirts, fasten buckles or pull up zippers for weeks” |
| Do you have problems writing?                                                                               | “No, I might feel some tingling in my hands, but I have no problems writing”                                                                | “It is a bit harder than before, but I can still write”                                                                             | “I have severe difficulties writing” or “I cannot write anymore”                                                                                                                           | “I haven’t been able to write for weeks”                                                       |
| Do you have problems putting on your jewelry or your watch?                                                 | “No, I might feel some tingling in my hands, but I have no problems putting on my jewelry or my watch”                                      | “It is a bit harder than before, but I can still put on my jewelry or my watch”                                                     | “I have severe difficulties putting on my jewelry or my watch” or “I cannot put on my jewelry or my watch anymore”                                                                         | “I haven’t been able to put on my jewelry or my watch for weeks”                               |
| Do you have problems walking?                                                                               | “No, I might feel some tingling in my feet, but I have no problems walking”                                                                 | “It is a bit harder than before, but I can still walk”                                                                              | “I have severe difficulties walking” or “I cannot walk anymore”                                                                                                                            | “I haven’t been able to walk for weeks”                                                        |
